# Supplementary material for: The Potential Impact of Labor Choices on the Efficacy of Marine Conservation Strategies
Source: PLoS One. 2011 Aug 24;6(8):e23722. doi: 10.1371/journal.pone.0023722 (PMC3161065; doi:10.1371/journal.pone.0023722)
Supplement: Table S3 — Equations used in simulation model. (DOCX) [file pone.0023722.s004.docx]

**Table S3**. Equations used in simulation model.

| Labor Market |  |
| --- | --- |
| Total Net Income | *W = w(·)s + Π(f , x, r)* |
| Fishing profit |  |
| Tourism wage rate, equal to marginal profit from fishing |  |
| Wage rage, equal to marginal profit from fishing |  |
| Tourism production |  |
| Fish production, Ricker Stock-Recruitment function |  |
| Stock dynamic equation |  |
